# Supplementary material for: Diagnostic value of WIF1 methylation for colorectal cancer: a meta-analysis
Source: PubMed Central journal article supplement (PMC5797056; doi:10.18632/oncotarget.23870), 2018-01-03
Supplement: oncotarget-09-5378-s001.pdf [file oncotarget-09-5378-s001.pdf]

# Diagnostic value of *WIF1* methylation for colorectal cancer: a meta-analysis

## SUPPLEMENTARY MATERIALS

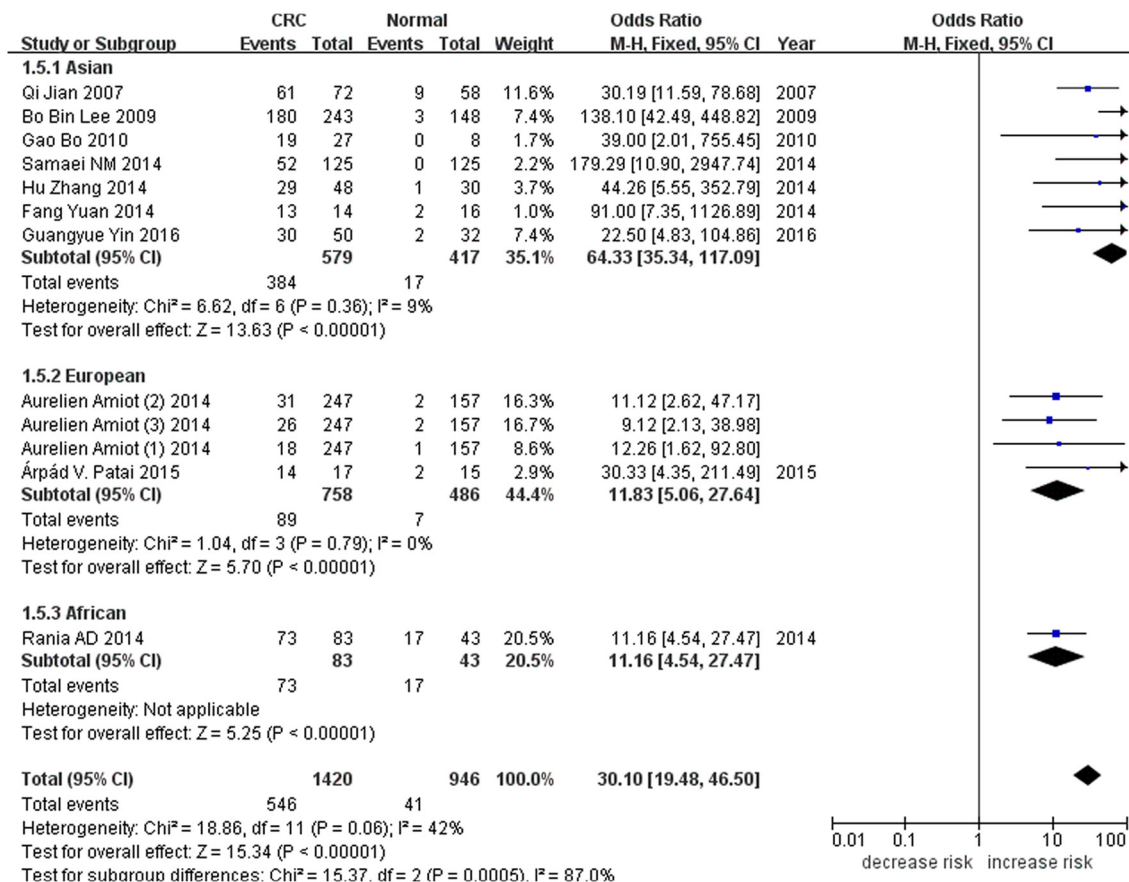

Supplementary Figure 1: Subgroup meta-analysis by ethnicity of *WIF1* methylation in CRC.

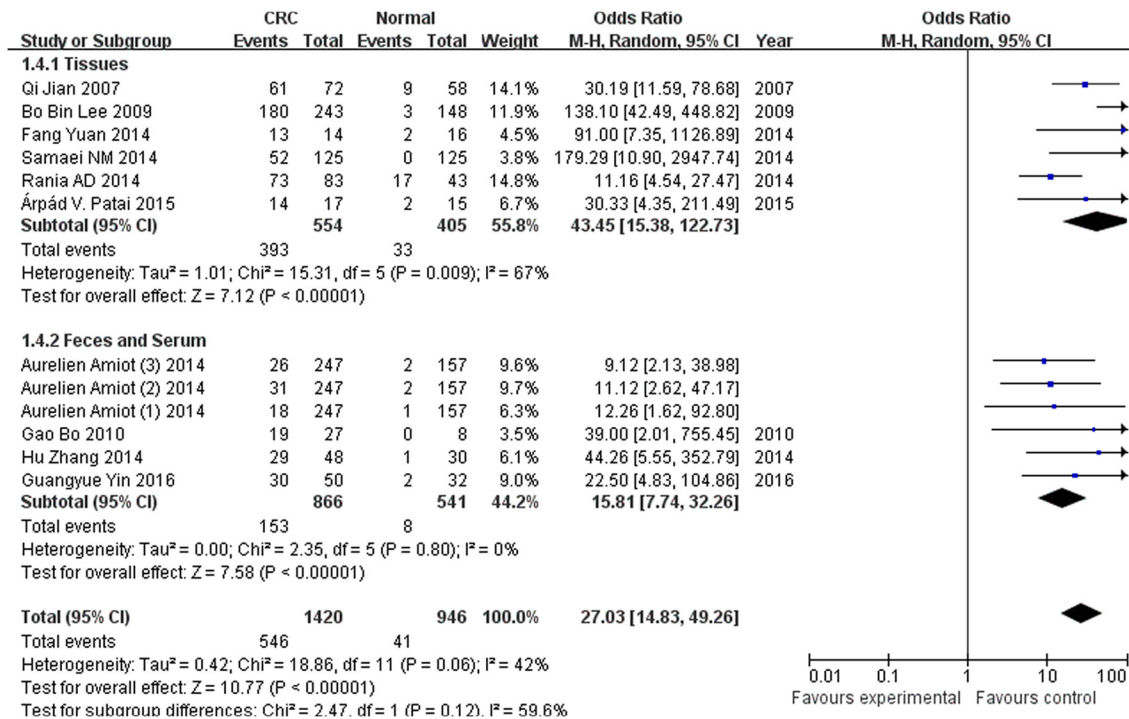

Supplementary Figure 2: Subgroup meta-analyses by sample type of *WIFI* methylation in CRC.

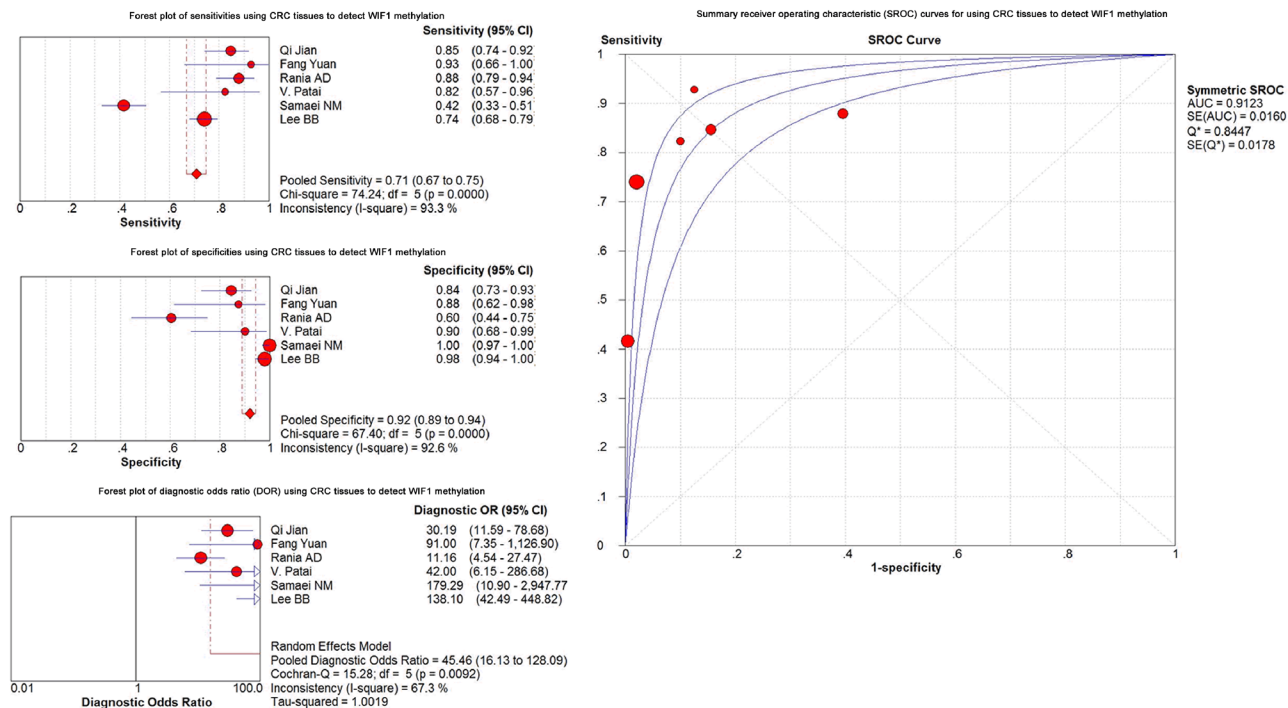

Supplementary Figure 3: Forest plots of sensitivities, specificities diagnostic odds ratio (DOR), and summary receiver operating characteristic (SROC) curves of *WIF1* hypermethylation as a diagnostic biomarker for CRC in tissues. AUC stands for area under the curve.

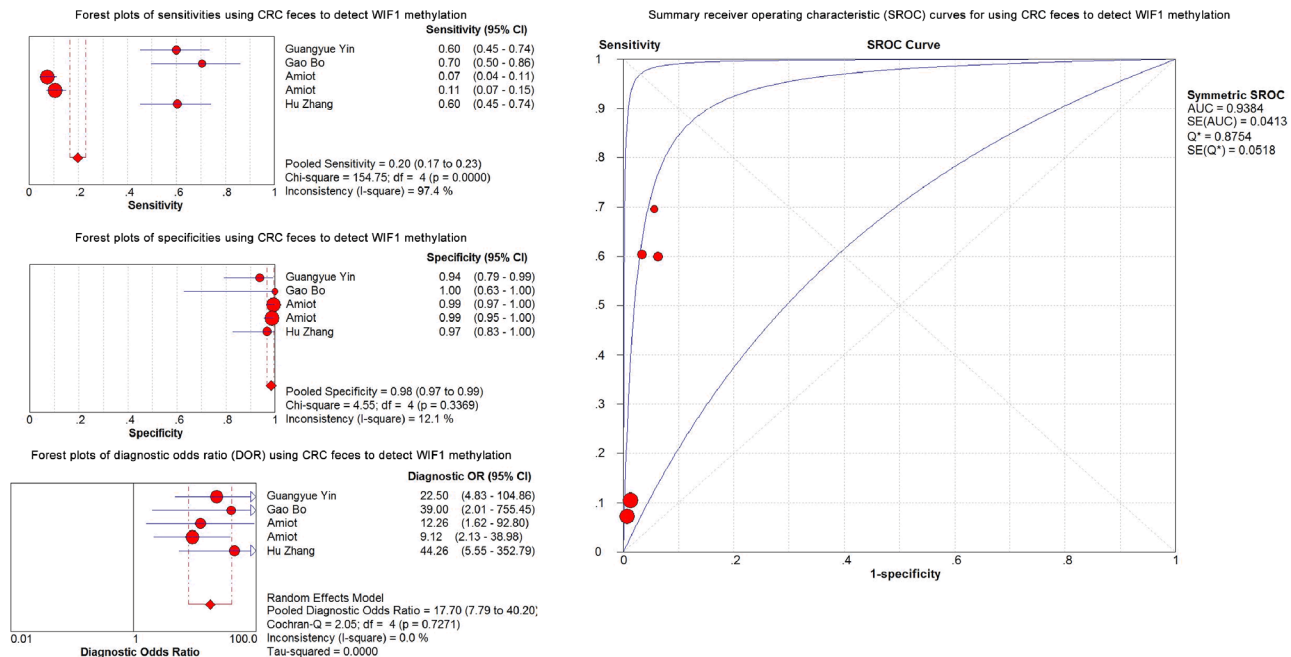

**Supplementary Figure 4: Forest plots of sensitivities, specificities diagnostic odds ratio (DOR), and summary receiver operating characteristic (SROC) curves of *WIF1* hypermethylation as a diagnostic biomarker for CRC in feces. AUC stands for area under the curve.**

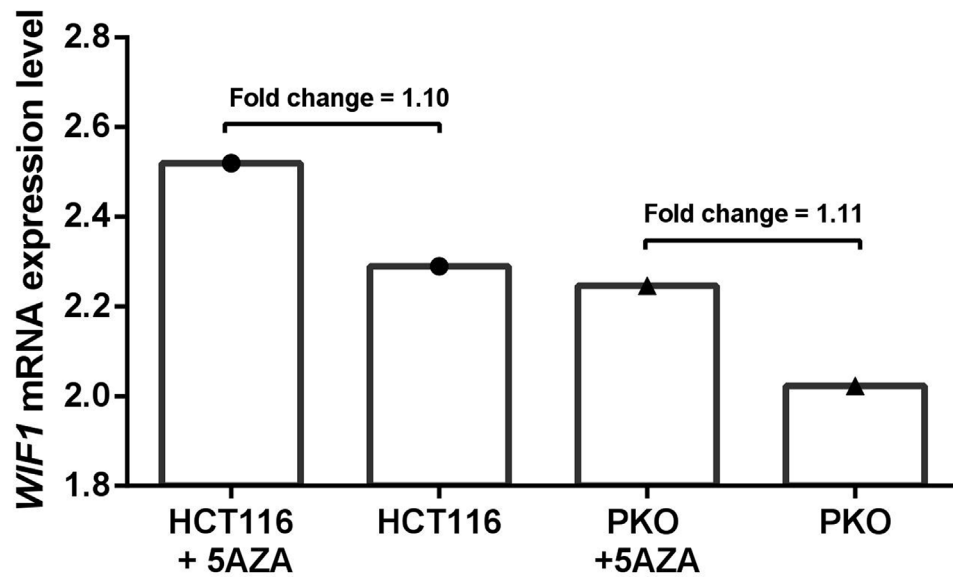

**Supplementary Figure 5: The expression value changes with and without 5AZA treatment in CRC cell lines (HCT116 and PKO) derive from the GEO database (GSE32323).** *WIF1* expression profiles for two CRC cell lines were measured by Affymetrix HG-U133 Plus 2.0 arrays. And the normalized gene expression levels were presented as log<sub>2</sub>-transformed values by robust multi-array average. 5AZA: cell line with 5-AZA-deoxycytidine treatment.
